# Supplementary material
Source: Research Square preprint supplement (doi:10.21203/rs.3.rs-9981738/v1)
Supplement: Supplementary file 1 [file 8a42b975348d631b7bebe7fe.pdf]

1 **Table of contents**

2 **Supplementary Fig.1 Standard curve for m<sup>6</sup>A quantification in *O. mykiss* ..... 2**

3 **Supplementary Fig. 2 Comparative structural analysis of m<sup>6</sup>A regulators genes in *O.***

4 ***mykiss*..... 3**

5 **Supplementary Fig. 3 Phylogenetic analysis of representative m<sup>6</sup>A writer and eraser genes**

6 **across vertebrates ..... 4**

7 **Supplementary Fig. 4 Relative expression levels of representative m<sup>6</sup>A writer and eraser**

8 **genes in gill tissues and gill epithelial cell line (RTgill-W1) of *O. mykiss* under different**

9 **salinity conditions ..... 6**

10 **Supplementary Fig. 5 MeRIP-qPCR validation for the enrichment of m<sup>6</sup>A methylation in**

11 **several genes..... 8**

12 **Supplementary Fig. 6 Overexpression experiment for master m<sup>6</sup>A demethylase *alkbh5a***

13 **in the gill epithelium of *O. mykiss*..... 9**

14 **Supplementary Fig. 7 RNA pull-down and LC-MS/MS analysis for identifying the binding**

15 **proteins of m<sup>6</sup>A methylation on *histone H1.0B* mRNA ..... 10**

16 **Supplementary Fig. 8 ATAC-seq profiling of chromatin accessibility in gill tissues of *O.***

17 ***mykiss* under freshwater (FW) and seawater (SW) groups.....11**

18 **Supplementary Fig. 9 Functional validation of *tonebp* paralogs in *O. mykiss*..... 12**

19 **Supplementary Fig. 10 Expression patterns of *tonebp1* knockdown in RTgill-W1 cells**

20 **..... .14**

21 **Supplementary Table 1 Gene information of m<sup>6</sup>A regulator genes in representative**

22 **vertebrate species..... 16**

23 **Supplementary Table 2 Primer sequences for RT-qPCR and MeRIP-qPCR experiments**

24 **..... 18**

25 **Supplementary Table 3 Statistics of MeRIP-seq data. .... 20**

26 **Supplementary Table 4 Characteristics of *histone H1.0B* gene in *O. mykiss*..... 21**

27 **Supplementary Table 5 Sequences for *histone H1.0B* m<sup>6</sup>A probes..... 21**

28 **Supplementary Table 6 Characteristics of *hnrnpab* paralog genes in *O. mykiss* ..... 21**

29 **Supplementary Table 7 Characteristics of *tonebp* paralog genes in *O. mykiss*..... 21**

30 **Supplementary Table 8 Probe sequences for fluorescence in situ hybridization of *nka* and**

31 ***tonebp1* ..... 21**

32 **Supplementary Table 9 Sequences of siRNAs for *tonebp1* knockdown in *O. mykiss*..... 21**

33 **Supplementary Table 10 Primer sequences for dual-luciferase assays..... 22**

34  
35

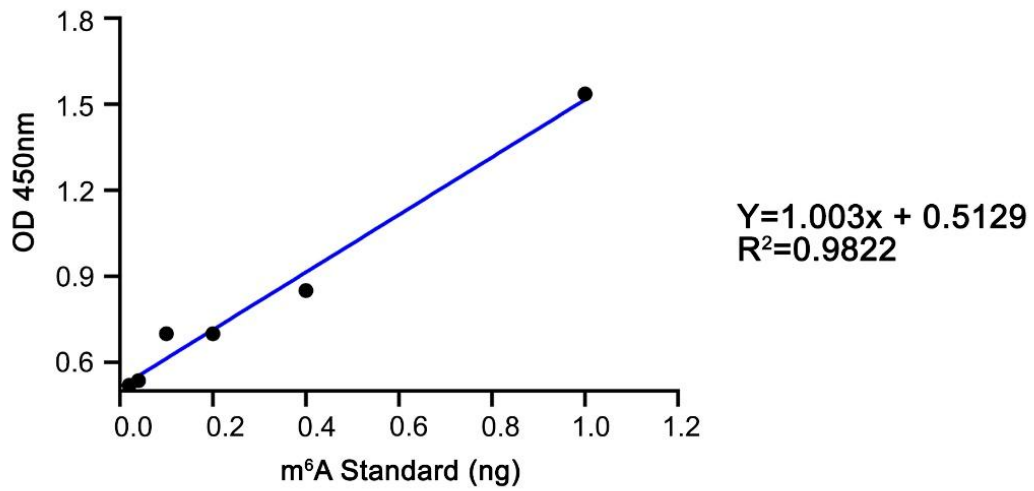

37

38 **Supplementary Fig.1 Standard curve for m<sup>6</sup>A quantification in *O. mykiss*.**39 Colorimetric method is performed for the m<sup>6</sup>A quantification. Standard substance of m<sup>6</sup>A methylation

40 is selected for the construction of standard curve at 450 nm, with showing clear linear relationship

41 (R<sup>2</sup>=0.9822). Data are presented as mean ± SEM from 3 independent experiments.

42

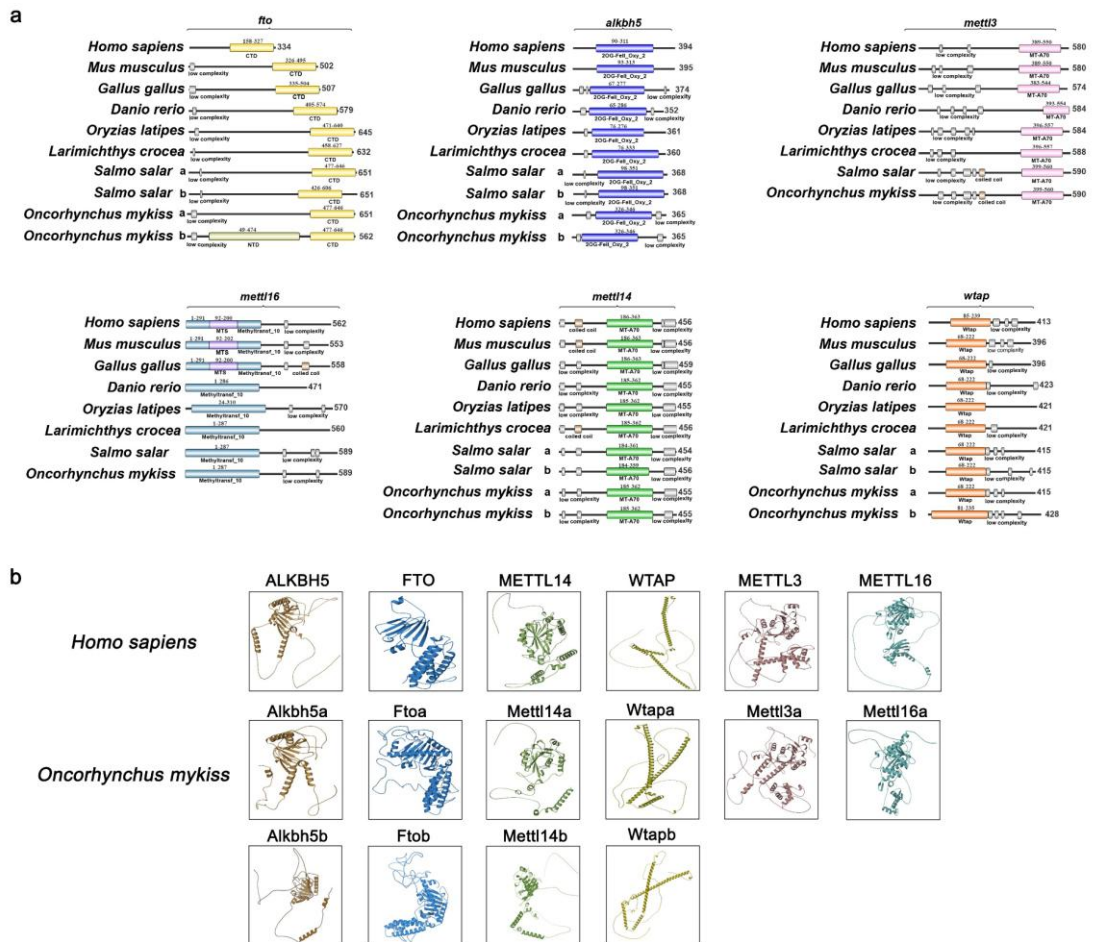

44

45 **Supplementary Fig. 2 Comparative structural analysis of m<sup>6</sup>A regulators genes in *O. mykiss*.**

46

47

48

49

50

51

52

53

(a) Conserved domain organization of representative m<sup>6</sup>A eraser and writer proteins across vertebrates, including human (*Homo sapiens*), mouse (*Mus musculus*), chicken (*Gallus gallus*), zebrafish (*Danio rerio*), Japanese medaka (*Oryzias latipes*), large yellow croaker (*Larimichthys crocea*), Atlantic salmon (*Salmo salar*) and rainbow trout (*Oncorhynchus mykiss*). Protein domains are predicted and displayed for *fto*, *alkbh5*, *mettl3*, *mettl16*, *mettl14* and *wtap* homologues. Domain positions and protein lengths are indicated above or beside each protein model; (b) Predicted three-dimensional structures of m<sup>6</sup>A regulators from *O. mykiss* and Homo sapiens, generated using SWISS-MODEL and visualized in PyMOL.

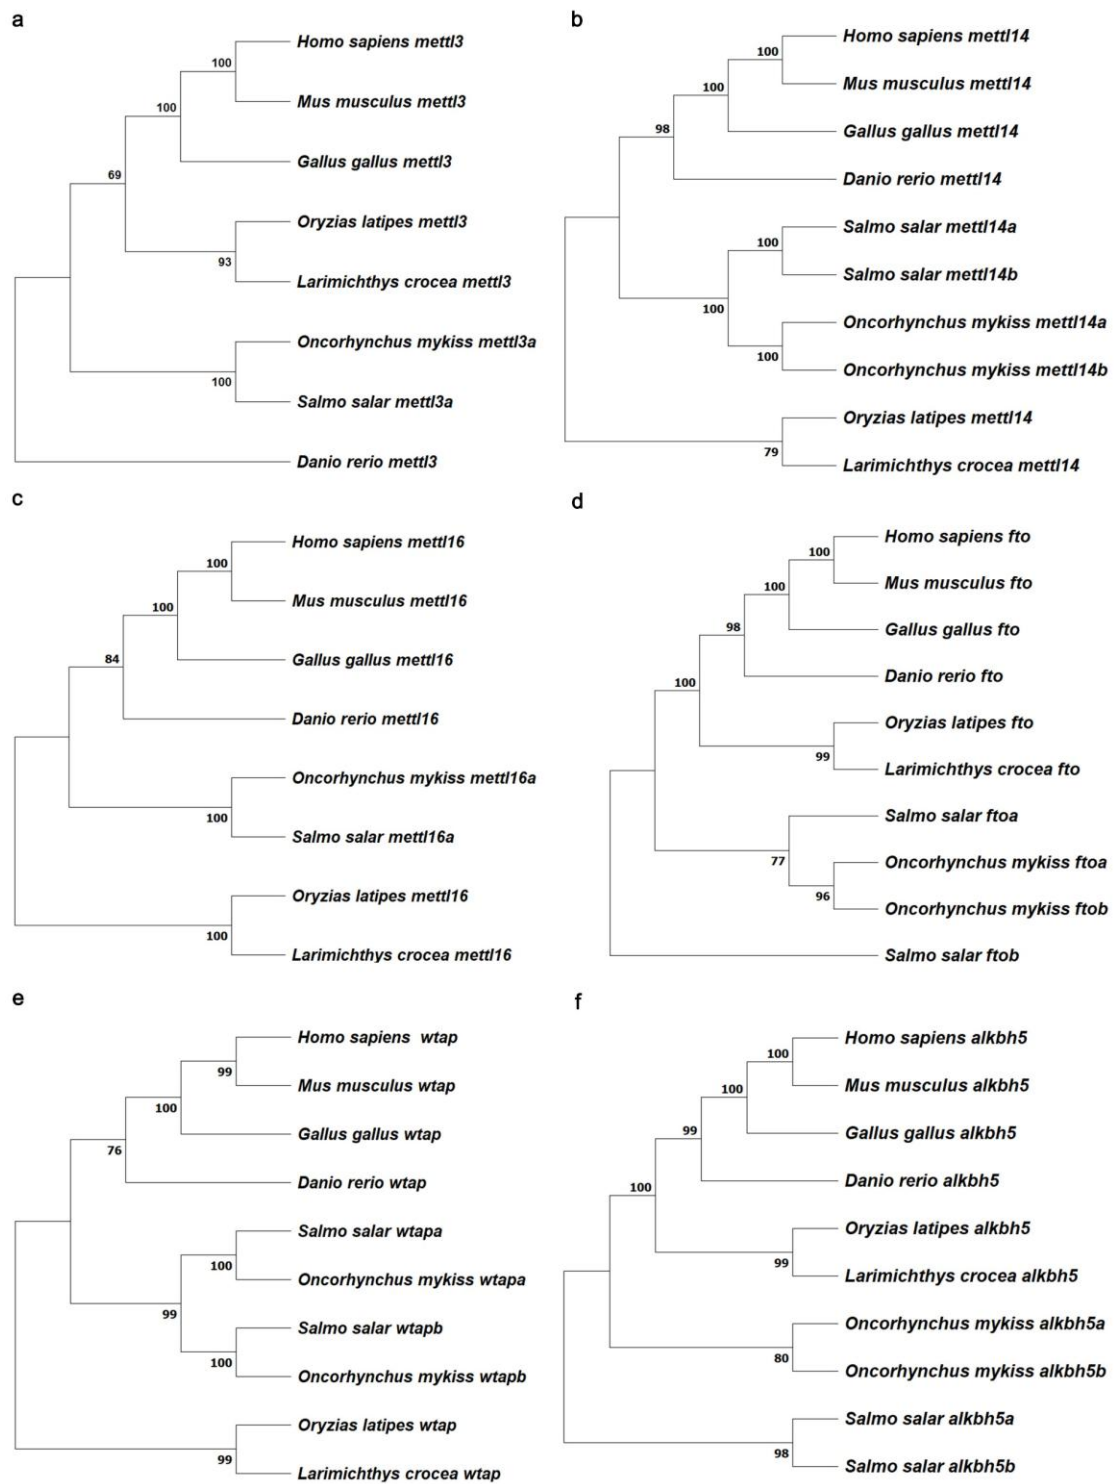

55

56 **Supplementary Fig. 3 Phylogenetic analysis of representative m<sup>6</sup>A writer and eraser genes across**  
 57 **vertebrates.**

58 Maximum-likelihood phylogenetic trees were constructed using full-length amino acid sequences of  
 59 selected m<sup>6</sup>A writer and eraser genes from *Homo sapiens*, *Mus musculus*, *Gallus gallus*, *Danio rerio*,  
 60 *Oryzias latipes*, *Larimichthys crocea*, *Salmo salar* and *Oncorhynchus mykiss*. Trees are shown for *mettl3*

61 (a), *mettl14* (b), *mettl16* (c), *fto* (d), *wtap* (e) and *alkbh5* (f), respectively. There are duplicated *mettl3*,  
62 *mettl14*, *mettl16*, *fto*, *wtap* and *alkbh5* genes in *S. salar* and *O. mykiss*, due to the salmonid-specific whole  
63 genome duplication events. However, *mettl3* and *mettl16* may have undergone the pseudogenization,  
64 absent in the phylogenetic tree (a and c). Numbers at internal nodes indicate bootstrap support values  
65 from 1,000 replicates. *O. mykiss* and Atlantic salmon duplicated copies are labelled with paralogue  
66 suffixes where applicable. The phylogenies were used to support gene identity assignment and to infer  
67 orthology/paralogy relationships among conserved m<sup>6</sup>A regulatory genes.

68

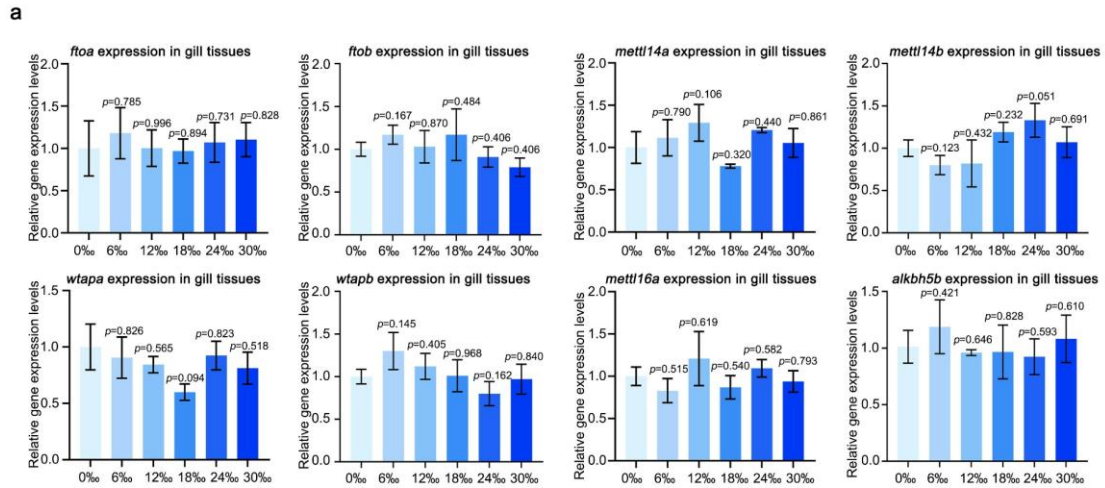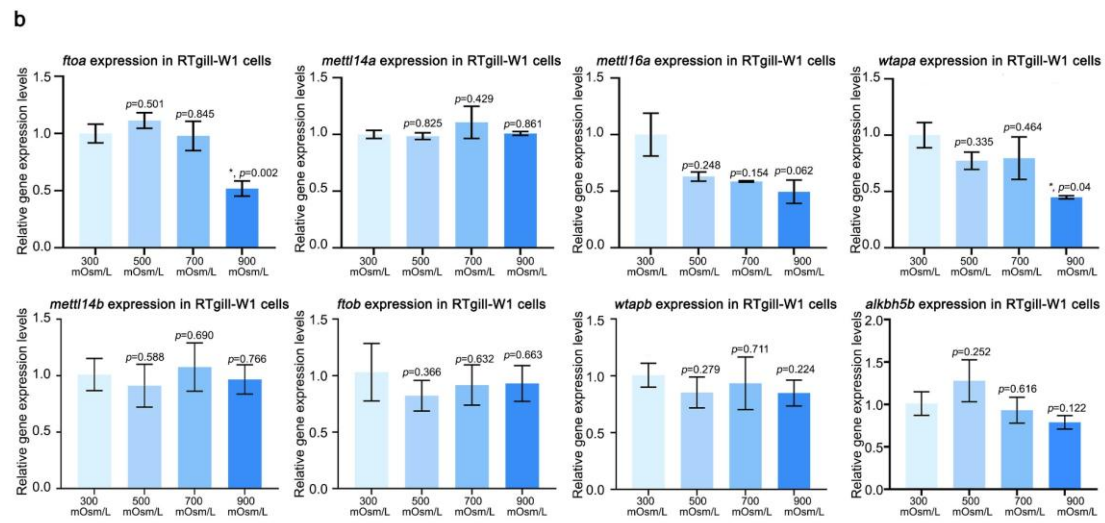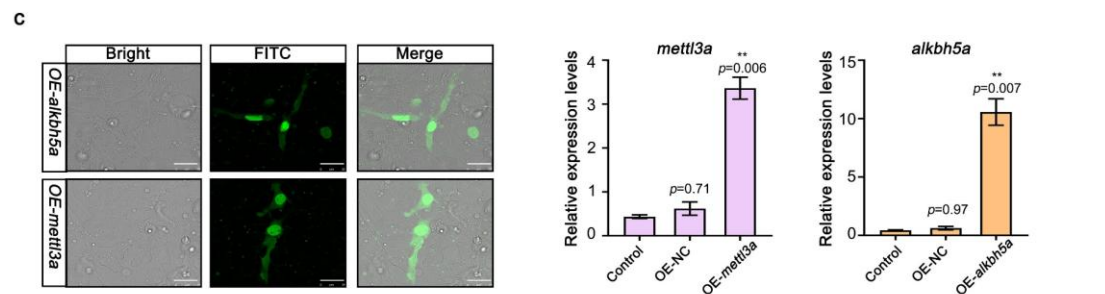

69

70 **Supplementary Fig. 4 Relative expression levels of representative m<sup>6</sup>A writer and eraser genes in**  
 71 **gill tissues and gill epithelial cell line (RTgill-W1) of *O. mykiss* under different salinity conditions.**

72 (a) Expression of m<sup>6</sup>A regulators in gill tissues (0‰–30‰); (b) Expression of m<sup>6</sup>A regulators in RTgill-  
 73 W1 cells (300–900 mOsm/L); (c) Overexpression of *alkbh5a* and *mettl3a* in RTgill-W1 cells. Left:  
 74 fluorescence images of cells transfected with OE-*alkbh5a* and OE-*mettl3a* plasmids (scale bar, 20 μm).  
 75 Right: validation of overexpression efficiency by RT-qPCR analysis. All qRT-PCR data are presented

76 as mean  $\pm$  SD (n = 3). Statistical significance was assessed using Student's t-test. ns, not significant; \*

77 p < 0.05; \*\* p < 0.01.

78

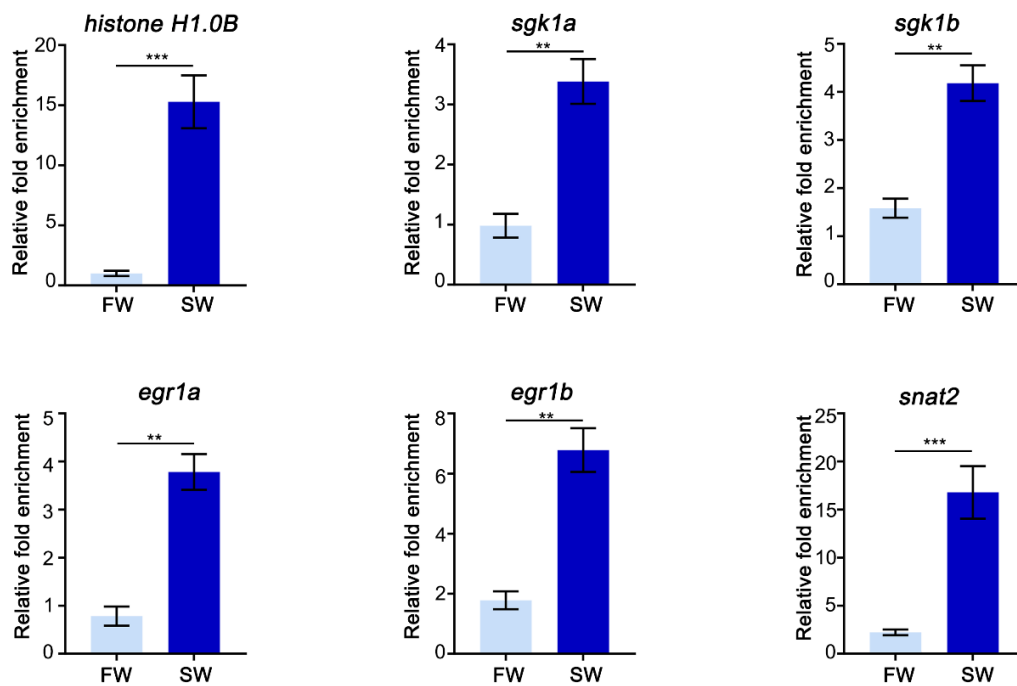

79

80 **Supplementary Fig. 5 MeRIP-qPCR validation for the enrichment of m<sup>6</sup>A methylation in several**

81 **genes.** A total of 6 genes are selected for the validation of different m<sup>6</sup>A abundance between the FW and

82 SW groups, detected by MeRIP-seq analysis, including *histone H1.0B*, *sgk1a*, *sgk1b*, *egr1a*, *egr1b*, and

83 *snat2*. MeRIP-qPCR experiment is conducted based on the immunoprecipitation between m<sup>6</sup>A antibody

84 and mRNAs of target genes (n = 3 biologically independent experiments). Data are presented as mean ±

85 SD. Statistical significance was evaluated using the Student's t test (\*p<0.05, \*\*p<0.01, \*\*\*p<0.001).

86

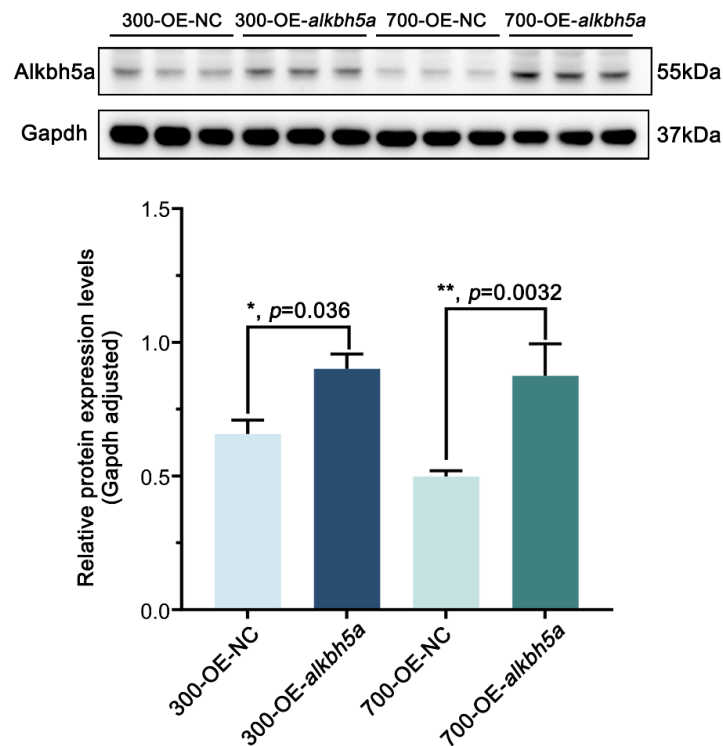

87

88 **Supplementary Fig. 6 Overexpression experiment for master m<sup>6</sup>A demethylase alkbh5a in the gill**

89 **epithelium of *O. mykiss*.** Overexpression vector of *alkbh5a* (OE-*alkbh5a* group) and empty vector (OE-

90 NC group) are transfected into RTgill-W1 cell line under normal (300 mOsm/L) and hyper-osmotic (700

91 mOsm/L) conditions, respectively. Western blotting experiments are then conducted to detect the protein

92 levels of Alkbh5a to confirm the success of transfection. Gapdh was used as the loading control.

93 Quantification of relative protein levels is shown below representative western blot images. Data are

94 presented as mean  $\pm$  SEM. ns, not significant; \*p < 0.05; \*\*p < 0.01.

95

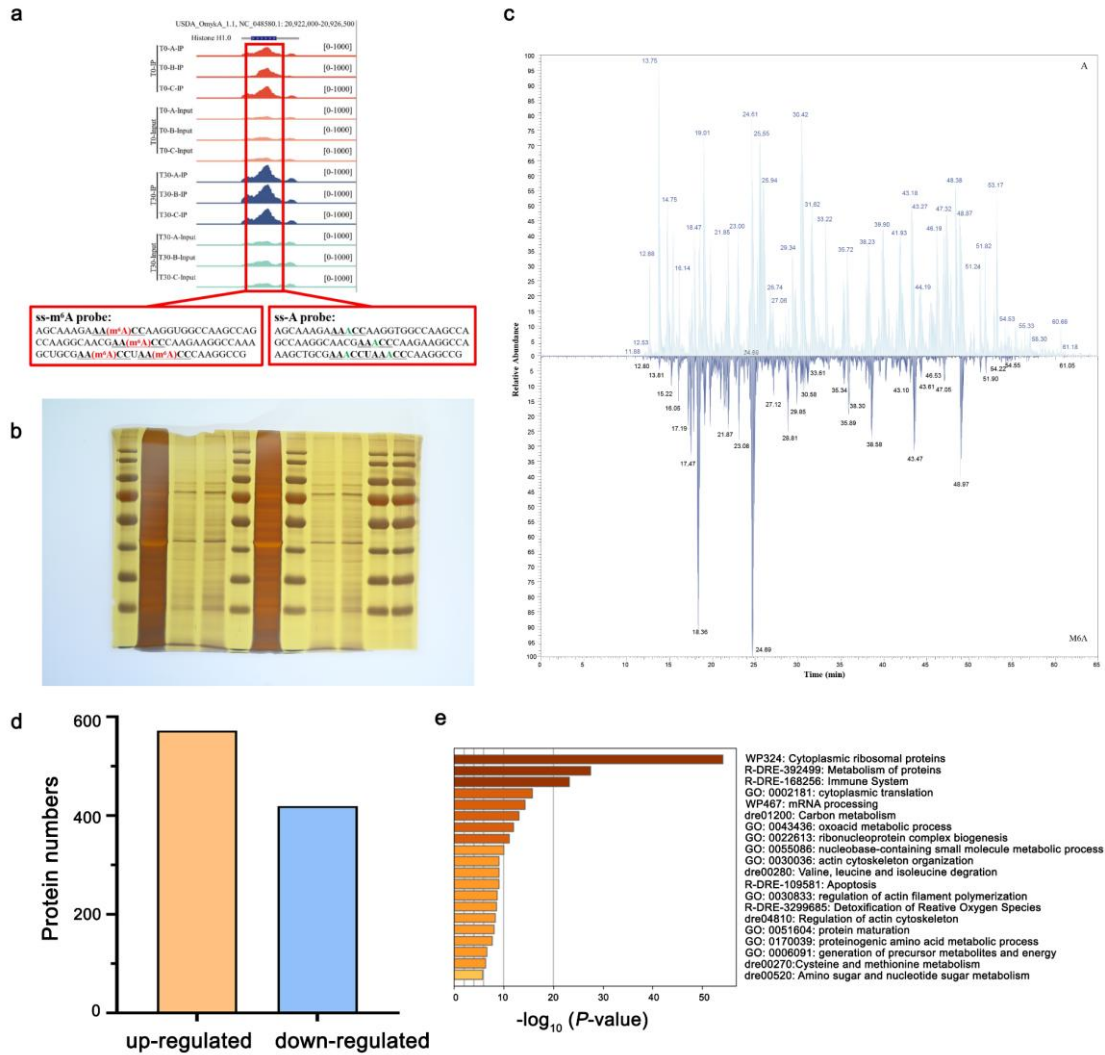

96

97 **Supplementary Fig. 7 RNA pull-down and LC-MS/MS analysis for identifying the binding proteins**

98 **of m<sup>6</sup>A methylation on *histone H1.0B* mRNA.** (a) Sequences of *histone H1.0B* ss-m<sup>6</sup>A probe (positive

99 probe) and ss-A probe (negative probe) for RNA pull-down analysis. Based on the different m<sup>6</sup>A

100 methylation abundance on *histone H1.0B* mRNAs detected by MeRIP-qPCR, biotin-labeled single-

101 stranded RNA probes, containing m<sup>6</sup>A (positive probe) or adenosine (negative probe), were

102 biosynthesized for RNA pull-down experiment; (b) Silver staining of proteins pulled down by ss-m<sup>6</sup>A

103 probe and ss-A probe; (c) LC-MS/MS analysis identified and quantified proteins in eluents generated

104 from RNA pull-down; (d) Different enriched proteins are pulled down between ss-m<sup>6</sup>A probe and ss-A

105 probe; (e) GO enrichment analysis reveals the potential functions of DEPs. Amino acid sequences of

106 differentially enriched proteins are submitted to Metascape online tool for identification of their

107 homologs so as to determine the enriched GO terms.

108

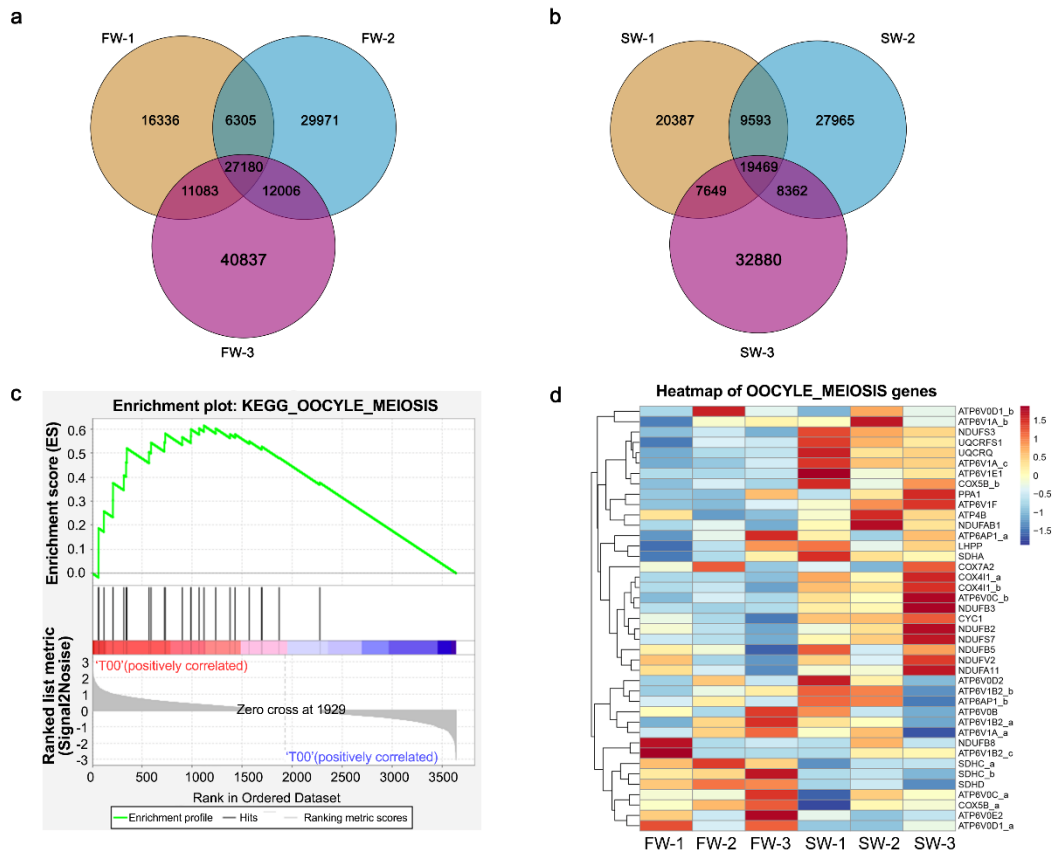

109

110 **Supplementary Fig. 8 ATAC-seq profiling of chromatin accessibility in gill tissues of *O. mykiss***

111 **under freshwater (FW) and seawater (SW) groups. (a) Venn diagram showing the intersections of**

112 **accessible chromatin regions (peaks) among 3 biological replicates of ATAC-seq (FW-1, FW-2, FW-3)**

113 **in the FW group; (b) Intersections of accessible peaks among biological replicates of ATAC-seq (SW-1,**

114 **SW-2, SW-3) in the SW group; (c) Gene set enrichment analysis (GSEA) of genes associated with**

115 **differentially accessible chromatin regions, showing enrichment of the oocyte meiosis pathway**

116 **(KEGG\_OOCYTE\_MEIOSIS); (d) Expression patterns of genes involved in the oocyte meiosis pathway**

117 **across FW and SW samples.**

118

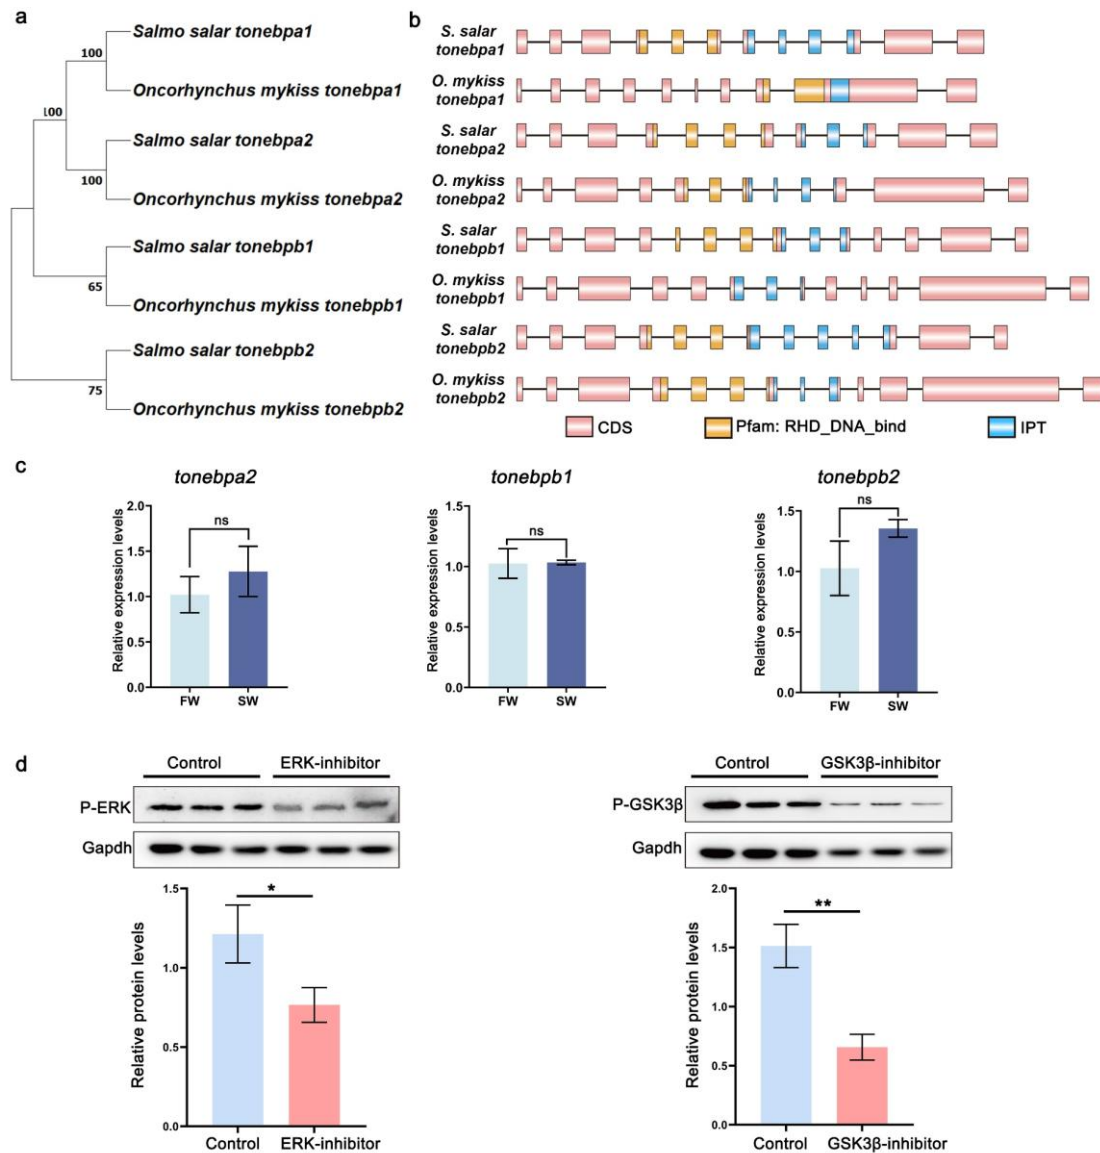

119

120 **Supplementary Fig. 9 Functional validation of *tonebp* paralogs in *O. mykiss*.** (a) Maximum-

121 likelihood phylogenetic tree of *tonebp* paralogs between *S. salar* and *O. mykiss*. Numbers at internal

122 nodes indicate supporting values by 1000 bootstrap replicates. The topology reveals the close

123 evolutionary relationships of *tonebp* genes between *S. salar* and *O. mykiss*; (b) Gene structure of four

124 *tonebp* paralogs (*tonebpa1*, *tonebpa2*, *tonebpb1*, and *tonebpb2*) in *S. salar* and *O. mykiss*, showing coding

125 sequences, conserved Pfam domains (RHD\_DNA\_bind) and IPT domains; (c) Relative mRNA

126 expression levels of *tonebpa2*, *tonebpb1* and *tonebpb2* between freshwater (FW) and seawater (SW)

127 groups. No significant differences were detected in any these *tonebp* paralogs between FW and SW

128 groups; (d) ERK and GSK3 $\beta$  inhibition experiments. The experiments are performed to further validate

129 the regulatory relationships between kinases and *tonebpa1* genes. ERK and GSK3 $\beta$  inhibitors are added

130 to the culture medium of RTgill-W1 cells, and then Western blot analysis is performed for the

131 effectiveness of inhibitors. Inhibitors significantly reduced phosphorylated levels of ERK1/2 and GSK3 $\beta$ .  
132 The *tonebpal* expression is repressed as shown in Fig. 4l-m. Gapdh was used as the loading control.  
133 Quantification of relative protein levels is shown below representative western blot images. Data are  
134 presented as mean  $\pm$  SEM. ns, not significant; \*p < 0.05; \*\*p < 0.01.  
135

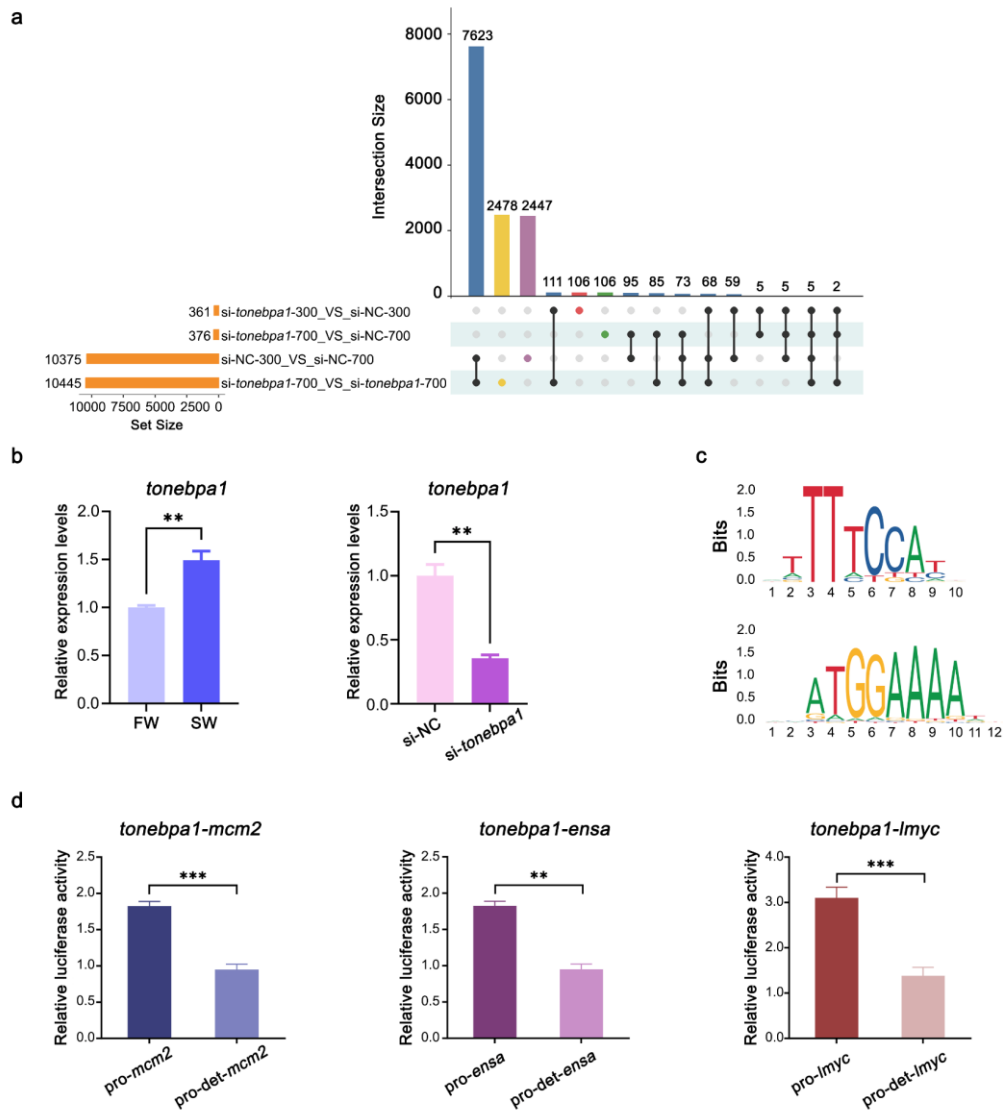

136

137 **Supplementary Fig. 10 Expression patterns of *tonebpa1* knockdown in RTgill-W1 cells.** (a)

138 Intersections of differentially expressed genes (DEGs) among different pairwise comparisons. The si-

139 RNAs are designed for *tonebpa1* knockdown, which are transfected into RTgill-W1 cells under normal

140 (300 mOsm/L) and hyper-osmotic (700 mOsm/L) conditions, resulting into 4 different groups, namely

141 si-NC-300, si-NC-700, si-*tonebpa1*-300, si-*tonebpa1*-700, respectively. Then, total RNAs of these groups

142 were extracted and submitted for RNA-seq. DEGs were identified based on the different pairwise

143 comparisons and strict thresholds; (b) Comparative gene expression levels of *tonebpa1*. The qPCR

144 experiment is performed for the detection of *tonebpa1* gene expression in gill epithelium between FW

145 and SW groups, and in RTgill-W1 between si-NC and si-*tonebpa1* groups (n = 3 biologically independent

146 experiments); (c) Binding motifs of *tonebpa1*. As a transcription factor, *tonebp* genes are able to bind the

147 neighbor regions of target genes. Their binding motif sequences are acquired from the JASPER database.

148 (d) Dual-luciferase reporter assays demonstrating the regulatory relationships between *tonebp1* and  
149 several target genes. Three target genes, including *mcm2*, *ensa*, and *lmyc*, are selected for the validation  
150 experiment. The *tonebp* overexpression vector and reference vector (Renilla Luciferase) are co-  
151 transfection into RTgill-W1 cells. Mutating of promoter sequences directly changes their expression  
152 levels, showing by the luciferase activity. Data are mean  $\pm$  SD of three independent experiments.  
153 Statistical significance was evaluated using Student's t test (\*\*p < 0.01).

154 **Supplementary Table 1 Gene information of m<sup>6</sup>A regulator genes in representative vertebrate**  
 155 **species.**

| Gene name       | Gene ID   | Chr     | Genomic location                  | Species                    |
|-----------------|-----------|---------|-----------------------------------|----------------------------|
| <i>mettl3</i>   | 56339     | 14      | NC_000014.9: 21498138-21511340    | <i>Homo sapiens</i>        |
| <i>mettl3</i>   | 56335     | 14      | NC_000080.7: 52532298-52548555    | <i>Mus musculus</i>        |
| <i>mettl3</i>   | 107050363 | 35      | NC_052566.1: 5728-28055           | <i>Gallus gallus</i>       |
| <i>mettl3</i>   | 100004398 | 7       | NC_133182.1: 21861395-21873008    | <i>Danio rerio</i>         |
| <i>mettl3</i>   | 101169238 | 18      | NC_136254.1: 17781145-17790359    | <i>Oryzias latipes</i>     |
| <i>mettl3</i>   | 104927608 | contigs | NW_017608411.1: 50351-55950       | <i>Larimichthys crocea</i> |
| <i>mettl3a</i>  | 139416030 | 18      | NC_138308.1: 80553025-80559532    | <i>Salmo salar</i>         |
| <i>mettl3b</i>  | 106608831 | 7       | NC_138297.1: 25918524-25922373    | <i>Salmo salar</i>         |
| <i>mettl3a</i>  | 110531644 | 9       | NC_092155.1: 18254770-18260807    | <i>Oncorhynchus mykiss</i> |
| <i>mettl3b</i>  | 110500847 | 21      | NC_048585.1: 43405498-43409042    | <i>Oncorhynchus mykiss</i> |
| <i>mettl14</i>  | 57721     | 4       | NC_000004.12: 118685392-118715430 | <i>Homo sapiens</i>        |
| <i>mettl14</i>  | 210529    | 3       | NC_000069.7: 123161944-123179639  | <i>Mus musculus</i>        |
| <i>mettl14</i>  | 422684    | 4       | NC_052535.1: 54492812-54516443    | <i>Gallus gallus</i>       |
| <i>mettl14</i>  | 404603    | 1       | NC_133176.1: 21568577-21573220    | <i>Danio rerio</i>         |
| <i>mettl14</i>  | 101170004 | 1       | NC_019859.2: 14174760-14186490    | <i>Oryzias latipes</i>     |
| <i>mettl14</i>  | 104930832 | contigs | NW_017608065.1: 344760-355828     | <i>Larimichthys crocea</i> |
| <i>mettl14a</i> | 123733213 | contigs | NW_025548665.1: 15820-51503       | <i>Salmo salar</i>         |
| <i>mettl14b</i> | 123732938 | contigs | NW_025548359.1: 518260-544059     | <i>Salmo salar</i>         |
| <i>mettl14a</i> | 110519301 | contigs | NW_023493710.1: 219895-246493     | <i>Oncorhynchus mykiss</i> |
| <i>mettl14b</i> | 118947005 | contigs | NW_023493659.1: 2462613-2483098   | <i>Oncorhynchus mykiss</i> |
| <i>mettl16a</i> | 110503873 | 24      | NC_048588.1: 16763694-16798239    | <i>Oncorhynchus mykiss</i> |
| <i>mettl16</i>  | 79066     | 17      | NC_000017.11: 2415715-2511888     | <i>Homo sapiens</i>        |
| <i>mettl16</i>  | 67493     | 11      | NC_000077.7: 74661658-74716649    | <i>Mus musculus</i>        |
| <i>mettl16</i>  | 431184    | 1       | NC_052532.1: 79468206-79479158    | <i>Gallus gallus</i>       |
| <i>mettl16</i>  | 445217    | 15      | NC_133190.1: 27686796-27745937    | <i>Danio rerio</i>         |
| <i>mettl16</i>  | 101169471 | 13      | NC_136249.1: 19699838-19721775    | <i>Oryzias latipes</i>     |
| <i>mettl16</i>  | 104935454 | contigs | NW_017608255.1: 1692-25634        | <i>Larimichthys crocea</i> |
| <i>mettl16a</i> | 100195164 | 9       | NC_059450.1: 128942309-128973388  | <i>Salmo salar</i>         |
| <i>mettl16b</i> | 110507704 | 27      | NC_048591.1: 19522166-19537134    | <i>Oncorhynchus mykiss</i> |
| <i>wtap</i>     | 9589      | 6       | NC_000006.12: 159726693-159756319 | <i>Homo sapiens</i>        |
| <i>wtap</i>     | 60532     | 17      | NC_000083.7: 13185686-13211430    | <i>Mus musculus</i>        |
| <i>wtap</i>     | 421588    | 3       | NC_052534.1: 45292520-45316337    | <i>Gallus gallus</i>       |
| <i>wtap</i>     | 334058    | 20      | NC_133195.1: 33718018-33724795    | <i>Danio rerio</i>         |
| <i>wtap</i>     | 101154997 | 24      | NC_136260.1: 17672146-17678483    | <i>Oryzias latipes</i>     |
| <i>wtap</i>     | 104922544 | contigs | NW_017609274.1: 1181963-1188460   | <i>Larimichthys crocea</i> |
| <i>wtapa</i>    | 100194790 | 15      | NC_059456.1: 55849486-55857223    | <i>Salmo salar</i>         |
| <i>wtapb</i>    | 100196682 | 1       | NC_059442.1: 43740239-43746579    | <i>Salmo salar</i>         |
| <i>wtapa</i>    | 110522352 | 4       | NC_048568.1: 27201542-27218948    | <i>Oncorhynchus mykiss</i> |
| <i>wtapb</i>    | 110529887 | 8       | NC_048572.1: 37793008-37801035    | <i>Oncorhynchus mykiss</i> |
| <i>fto</i>      | 790682    | 16      | NC_000016.10: 53703963-54121941   | <i>Homo sapiens</i>        |
| <i>fto</i>      | 26383     | 8       | NC_000074.7: 92039995-92395061    | <i>Mus musculus</i>        |

|                |           |         |                                 |                            |
|----------------|-----------|---------|---------------------------------|----------------------------|
| <i>fto</i>     | 415718    | 11      | NC_052542.1: 4295663-4518110    | <i>Gallus gallus</i>       |
| <i>fto</i>     | 553363    | 7       | NC_133182.1: 36218728-36450533  | <i>Danio rerio</i>         |
| <i>fto</i>     | 101162356 | 3       | NC_136239.1: 33188470-33311741  | <i>Oryzias latipes</i>     |
| <i>fto</i>     | 104918019 | VIII    | NC_040018.1: 21965821-22080500  | <i>Larimichthys crocea</i> |
| <i>fto</i>     | 106587595 | 26      | NC_138316.1: 29703289-29881240  | <i>Salmo salar</i>         |
| <i>ftob</i>    | 106587580 | 11      | NC_138301.1: 30253154-30417161  | <i>Salmo salar</i>         |
| <i>ftoa</i>    | 110526968 | 6       | NC_048570.1: 76827001-77038395  | <i>Oncorhynchus mykiss</i> |
| <i>ftob</i>    | 110506743 | 26      | NC_048590.1: 37021575-37243475  | <i>Oncorhynchus mykiss</i> |
| <i>alkbh5</i>  | 54890     | 17      | NC_000017.11: 18183828-18209954 | <i>Homo sapiens</i>        |
| <i>alkbh5</i>  | 268420    | 11      | NC_000077.7: 60428509-60449338  | <i>Mus musculus</i>        |
| <i>alkbh5</i>  | 770703    | 14      | NC_052545.1: 5043695-5061240    | <i>Gallus gallus</i>       |
| <i>alkbh5</i>  | 770703    | 1       | NC_133176.1: 9940665-9949717    | <i>Danio rerio</i>         |
| <i>alkbh5</i>  | 101168432 | 1       | NC_136237.1: 18758509-18764990  | <i>Oryzias latipes</i>     |
| <i>alkbh5</i>  | 104921183 | contigs | NW_017608462.1: 1424210-1429959 | <i>Larimichthys crocea</i> |
| <i>alkbh5a</i> | 106594281 | 2       | NC_059443.1: 93319743-93325755  | <i>Salmo salar</i>         |
| <i>alkbh5b</i> | 106593210 | 12      | NC_059453.1: 2182228-2191788    | <i>Salmo salar</i>         |
| <i>alkbh5b</i> | 118949617 | contigs | NW_023493746.1: 68819-76888     | <i>Oncorhynchus mykiss</i> |
| <i>alkbh5a</i> | 118947576 | contigs | NW_023493669.1: 380651-386909   | <i>Oncorhynchus mykiss</i> |

156

157

**Supplementary Table 2 Primer sequences for RT-qPCR and MeRIP-qPCR experiments.**

| Gene name                                                     | Primer sequence (5' - 3')                                                          |
|---------------------------------------------------------------|------------------------------------------------------------------------------------|
| <i>mettl3a</i>                                                | Forward (F): ATTGGAAGGCTGGAGGAGGAAGG<br>Reverse (R): TGCTGGTTCAGGAGGCTCTCTATC      |
| <i>mettl14a</i>                                               | Forward (F): CGCCAGATGAGAGCAACCCTTATG<br>Reverse (R): GATGAAGTTCTGTGGTCGGTGTCC     |
| <i>mettl14b</i>                                               | Forward (F): GGACACCGACCACAGAACTTCA<br>Reverse (R): GGCTCCAGCAGGATCACATCA          |
| <i>mettl16a</i>                                               | Forward (F): TATCGGTAAGTGGAGCGTCCTGTATC<br>Reverse (R): TGGTGGCATAGTCAAAGCAGATGTCC |
| <i>wtapa</i>                                                  | Forward (F): CTGCTGTGGTTGCCATCGTCTC<br>Reverse (R): CCAGTATGTGTTGACCGCCTTAGC       |
| <i>wtapb</i>                                                  | Forward (F): ACGATGTGACTGGGCTGAAGGA<br>Reverse (R): GGTTGCTGGACTTGCTTGAGGTA        |
| <i>ftoa</i>                                                   | Forward (F): CCAGGAATGCTCTAATCTC<br>Reverse (R): TCCCATAATACGGCTCTT                |
| <i>ftob</i>                                                   | Forward (F): GTCAAGACACGGCGACGAGAT<br>Reverse (R): GCCACTCTGCTGGTCTTCATCC          |
| <i>alkbh5a</i>                                                | Forward (F): GTCATTGAGGGCAAGATAAA<br>Reverse (R): CGCCTGGTTGGTAGTCGT               |
| <i>alkbh5b</i>                                                | Forward (F): CGTAGCAACAGCTCCGAGAA<br>Reverse (R): ATCCAGTCCGGTGTTCAGTG             |
| <i>18S rRNA</i>                                               | Forward (F): ATGGCCGTTCTTAGTTGGTG<br>Reverse (R): TCAGTCTCGTGTGGCTGAAC             |
| OE- <i>mettl3a</i>                                            | Forward (F): CAAAGAGGAGTGTACGCGGT<br>Reverse (R): GGGGCGTCGATCTCATAGTG             |
| OE- <i>alkbh5a</i>                                            | Forward (F): GGCGGGGTTACAGTAAGACT<br>Reverse (R): AGTCTTCACGTTGTGGTTCTCT           |
| <i>Histone H 1.0B</i>                                         | Forward (F): CGGGAATACTTGAAGTGAACC<br>Reverse (R): CATGGACGGCTGCCTTAA              |
| <i>serine/threonine-protein kinase Sek 1a (sgk1a)</i>         | Forward (F): CTCCTATGGACCCGCTGAC<br>Reverse (R): GCAAACCTCCTAAACTGCTCTAA           |
| <i>serine/threonine-protein kinase Sek 1b (sgk1b)</i>         | Forward (F): CCACTCTGGGTTAGGATT<br>Reverse (R): TTTACTAACTAGGACGGACTC              |
| <i>early growth response protein 1a (egr1a)</i>               | Forward (F): CCGGTTTCAACTCTGGCTCT<br>Reverse (R): CGTCAAGGACTGGGCAAAGA             |
| <i>early growth response protein 1b (egr1b)</i>               | Forward (F): CCTTTCCATCCTCTGTGCGT<br>Reverse (R): AGTCCACCCTCTCTCAAAGA             |
| <i>sodium-coupled neutral amino acid transporter2 (snat2)</i> | Forward (F): TGGATCAACAACGCCTCACA<br>Reverse (R): TTGGGTAGCAGTCTTAGCGG             |
| <i>hnrapab1</i>                                               | Forward (F): ATGAAGCCGAGGAAGAAGTAA<br>Reverse (R): AACCAAGATGAACCCAAACCCAC         |
| <i>tonebpa1</i>                                               | Forward (F): AACGGTTGTCTGGGTCCATT                                                  |

---

|                 |                                                                                                               |
|-----------------|---------------------------------------------------------------------------------------------------------------|
| <i>tonebpa2</i> | Reverse (R): CCAACGAACATTAGCGGGCA<br>Forward (F): CCAGACTCAGCAGATAAGTCCC<br>Reverse (R): CAGGGTCAGAGGCCAGATAA |
| <i>tonebpb1</i> | Forward (F): TGCCAAATAGCGTTTTGTTTGT<br>Reverse (R): CCCTCAGATATGAACGTCGCT                                     |
| <i>tonebpb2</i> | Forward (F): AGCGTGTTACACAGGCTAAT<br>Reverse (R): ACCGTCGTTGAGCTAGCAA                                         |

---

160 **Supplementary Table 3 Statistics of MeRIP-seq data.**

| Sample ID  | Raw reads  | Raw bases (Gb) | Clean reads | Clean bases (Gb) | Clean base percentage (%) | Q20   | Q30   | Aligned reads       |
|------------|------------|----------------|-------------|------------------|---------------------------|-------|-------|---------------------|
| FW_A_IP    | 36,380,770 | 5.46           | 35,864,342  | 5.14             | 94.15                     | 97.96 | 94.31 | 33,054,956 (92.17%) |
| FW_B_IP    | 42,665,344 | 6.40           | 41,826,482  | 5.74             | 89.72                     | 97.55 | 93.66 | 36,572,134 (87.44%) |
| FW_C_IP    | 39,779,548 | 5.97           | 39,143,460  | 5.58             | 93.52                     | 97.79 | 93.99 | 35,570,325 (90.87%) |
| SW_A_IP    | 39,455,494 | 5.92           | 38,844,038  | 5.51             | 93.18                     | 97.88 | 94.17 | 35,490,370 (91.37%) |
| SW_B_IP    | 40,600,906 | 6.09           | 39,865,770  | 5.68             | 93.34                     | 97.72 | 93.86 | 36,076,365 (90.50%) |
| SW_C_IP    | 39,394,694 | 5.91           | 38,682,478  | 5.54             | 93.67                     | 97.74 | 93.92 | 35,070,278 (90.66%) |
| FW_A_input | 43,432,834 | 6.51           | 43,130,074  | 6.00             | 92.08                     | 98.32 | 95.01 | 40,255,203 (93.34%) |
| FW_B_input | 51,458,960 | 7.72           | 51,085,382  | 7.10             | 91.98                     | 98.26 | 94.88 | 47,302,137 (92.59%) |
| FW_C_input | 46,685,974 | 7.00           | 46,364,812  | 6.47             | 92.36                     | 98.25 | 94.86 | 43,129,341 (93.02%) |
| SW_A_input | 39,685,724 | 5.95           | 39,408,788  | 5.50             | 92.32                     | 98.27 | 94.9  | 36,806,038 (93.40%) |
| SW_B_input | 51,513,130 | 7.73           | 51,171,186  | 7.14             | 92.42                     | 98.29 | 94.96 | 47,529,949 (92.89%) |
| SW_C_input | 46,950,068 | 7.04           | 46,634,446  | 6.50             | 92.37                     | 98.32 | 95.02 | 43,027,179 (92.27%) |

161

162

163 **Supplementary Table 4 Characteristics of *histone H1.0B* gene in *O. mykiss*.**

| Gene name            | Gene ID   | Chr | Genomic location               | Species                    |
|----------------------|-----------|-----|--------------------------------|----------------------------|
| <i>histone H1.0B</i> | 110491606 | 16  | NC_048580.1: 20924087-20925551 | <i>Oncorhynchus mykiss</i> |

164

165 **Supplementary Table 5 Sequences for *histone H1.0B* m<sup>6</sup>A probes.**

| name                | Probe sequence (5' - 3')                                                                              |
|---------------------|-------------------------------------------------------------------------------------------------------|
| ss-m <sup>6</sup> A | AGCAAAGAAA <b>m<sup>6</sup></b> ACCAAGGUGGCCAAGCCAGCCAAGGCAACGA <b>m<sup>6</sup></b>                  |
| Positive probe      | <b>A</b> CCCAAGAAGGCCAAAGCUGCGAA <b>m<sup>6</sup></b> ACC <b>UAA</b> <b>m<sup>6</sup></b> ACCCAAGGCCG |
| ss-A                | AGCAAAGAAA <b>A</b> CCAAGGUGGCCAAGCCAGCCAAGGCAACGAA <b>ACC</b>                                        |
| Negative probe      | AAGAAGGCCAAAGCUGCGAA <b>A</b> CC <b>UAA</b> <b>A</b> CCCAAGGCCG                                       |

166

167 **Supplementary Table 6 Characteristics of *hnrnpab* paralog genes in *O. mykiss*.**

| Gene name       | Gene ID   | Chr | Genomic location               | Species                    |
|-----------------|-----------|-----|--------------------------------|----------------------------|
| <i>hnrnpab1</i> | 110537820 | 12  | NC_048576.1: 56575548-56581114 | <i>Oncorhynchus mykiss</i> |
| <i>hnrnpab2</i> | 110504804 | 31  | NC_050571.1: 23844402-23848266 | <i>Oncorhynchus mykiss</i> |
| <i>hnrnpab3</i> | 110533317 | 10  | NC_048574.1: 8302180-8308063   | <i>Oncorhynchus mykiss</i> |
| <i>hnrnpab4</i> | 110488598 | 14  | NC_048578.1: 4963367-4969132   | <i>Oncorhynchus mykiss</i> |

168

169 **Supplementary Table 7 Characteristics of *tonebp* paralog genes in *O. mykiss*.**

| Gene name       | Gene ID   | Chr | Genomic location               | Species                    |
|-----------------|-----------|-----|--------------------------------|----------------------------|
| <i>tonebpa1</i> | 106561332 | 10  | NC_138300.1: 98286056-98309736 | <i>Salmo salar</i>         |
| <i>tonebpa1</i> | 110496711 | 2   | NC_048566.1: 77697226-77716788 | <i>Oncorhynchus mykiss</i> |
| <i>tonebpa2</i> | 106573386 | 16  | NC_138306.1: 24229993-24251784 | <i>Salmo salar</i>         |
| <i>tonebpa2</i> | 110521983 | 1   | NC_048565.1: 35709824-35731063 | <i>Oncorhynchus mykiss</i> |
| <i>tonebpb1</i> | 106562092 | 11  | NC_138301.1: 19957225-20021754 | <i>Salmo salar</i>         |
| <i>tonebpb1</i> | 110506508 | 26  | NC_048590.1: 26344232-26404304 | <i>Oncorhynchus mykiss</i> |
| <i>tonebpb2</i> | 106587185 | 26  | NC_138316.1: 19198743-19251578 | <i>Salmo salar</i>         |
| <i>tonebpb2</i> | 110526388 | 6   | NC_048570.1: 66506911-66565353 | <i>Oncorhynchus mykiss</i> |

170

171 **Supplementary Table 8 Probe sequences for fluorescence in situ hybridization of *nka* and *tonebpa1*.**

| Gene name       | Primer sequences (5' - 3')                                    |
|-----------------|---------------------------------------------------------------|
| <i>tonebpa1</i> | Forward (F): ATTTAGGTGACACTATAGCTCGAGATGCCCTCTGATTTTATATCCCTC |
|                 | Reverse (R): TAATACGACTCACTATAGGGGAATTCTACTGCTCCTGTAGGCTC     |
| <i>nka</i>      | Forward (F): ATTTAGGTGACACTATAGGGGAAGGCTGGAGGAGGAAGG          |
|                 | Reverse (R): TAATACGACTCACTATAGGGATGAACCCAAACCCAAGCCTCTTA     |

172

173 **Supplementary Table 9 Sequences of siRNAs for *tonebpa1* knockdown in *O. mykiss*.**

| Gene name              | Sequences (5' - 3') |
|------------------------|---------------------|
| si- <i>tonebpa1</i> -s | CGACCAGACCUCUGCUCAU |
| si- <i>tonebpa1</i> -a | AUGAGCAGAGGUCUGGUCG |

174

175 **Supplementary Table 10 Primer sequences for dual-luciferase assays.**

| Gene name       | Primer sequences (5' - 3')                             |
|-----------------|--------------------------------------------------------|
| <i>tonebpa1</i> | Forward (F): CTCGAGATGCCCTCTGATTTTATATCCCTC            |
|                 | Reverse (R): GAATTCTCACTGCTCCTGTAGGCTC                 |
| <i>mcm2</i>     | Forward (F): GAGCTCAGGAGCATGCCATAGCTACAAT              |
|                 | Reverse (R): CTCGAGATATGAGACCCGATCCAGTCGATC            |
| <i>ensa</i>     | Forward (F): GAGCTCCGCACCAATAACCAACCAACTGTC            |
|                 | Reverse (R): CTCGAGACCGCGCTTAGCTACTTTGTTGCTC           |
| <i>lmyc</i>     | Forward (F): GGTACCTGACTGGCAAATCGAGGCA                 |
|                 | Reverse (R): CTCGAGCAGCCCATCTGTAAATAGCCCA              |
| <i>mcm-det</i>  | Forward (F): CTTACCATCTCTCCACTGCCTTTTCCATGACCTGACCAG   |
|                 | Reverse (R): CTGGTCAGGTCATGGAAAAGGCAGTGGAGAGATGGTAAG   |
| <i>ensa-det</i> | Forward (F): GGTATTTATCTGAATGTTACCGGAAAACCATCCCAGATAG  |
|                 | Reverse (R): CTATCTGGGATGGTTTTCCGGTAAACATTCAGATAAATACC |
| <i>lmyc-det</i> | Forward (F): ATAAATACATTTTATTTAACCGGAAAATTCTGTGAACTGGC |
|                 | Reverse (R): GCCAGTTCACAGAATTTTCCGGTTAAATAAAATGTATTTAT |

176
